# Supplementary material for: High-purity C3N quantum dots for enhancing fluorescence detection of metal ions
Source: Royal Society of Chemistry journal article supplement (doi:10.1039/d4ra00887a), 2024-01-01
Supplement: d4ra00887a1.pdf [file d4ra00887a1.pdf]

## **Supplementary Information**

### **High-purity C<sub>3</sub>N quantum dots for enhancing fluorescence detection of metal ions**

Huan Yang,<sup>†a,b</sup> Changdao Han,<sup>†c</sup> Jie Jiang,<sup>\*a</sup> Pei Li,<sup>\*a,b</sup> Liang Chen,<sup>a</sup>

<sup>a</sup>*School of Physical Science and Technology, Ningbo University, Ningbo 315211, China.*

<sup>b</sup>*State Key Laboratory of Surface Physics and Department of Physics, Fudan University,  
Shanghai 200433, China*

<sup>c</sup>*Department of Optical Engineering, College of Optical, Mechanical and Electrical  
Engineering, Zhejiang A&F University, Hangzhou 311300, China.*

<sup>†</sup>These authors contributed equally: Huan Yang, and Changdao Han.

<sup>\*</sup>Corresponding author. E-mail: lipei@nbu.edu.cn (P. L.); jiejiang1@nbu.edu.cn (J. J.).

# Contents

|                                                                                                                                                                                                                                                                                                                       |    |
|-----------------------------------------------------------------------------------------------------------------------------------------------------------------------------------------------------------------------------------------------------------------------------------------------------------------------|----|
| <b>Eq S1. Yield Calculation</b> .....                                                                                                                                                                                                                                                                                 | 2  |
| <b>Fig. S1. HRTEM patterns of C<sub>3</sub>N QDs</b> .....                                                                                                                                                                                                                                                            | 2  |
| <b>Fig. S2. Particle Size Distribution of C<sub>3</sub>N QDs</b> .....                                                                                                                                                                                                                                                | 2  |
| <b>Fig. S3. C 1s Spectra of DAP and C<sub>3</sub>N QDs</b> .....                                                                                                                                                                                                                                                      | 3  |
| <b>Table S1. Atomic fractions of C<sub>3</sub>N QDs and DAP by XPS</b> .....                                                                                                                                                                                                                                          | 3  |
| <b>Fig. S4. FTIR Spectra of C<sub>3</sub>N QDs and DAP</b> .....                                                                                                                                                                                                                                                      | 4  |
| <b>Fig. S5. Lifetime of C<sub>3</sub>N QDs</b> .....                                                                                                                                                                                                                                                                  | 5  |
| <b>Fig. S6. The fluorescence spectra of C<sub>3</sub>N QDs w/o Al<sup>3+</sup>, Ga<sup>3+</sup>, In<sup>3+</sup>, and Sc<sup>3+</sup> ions at different concentrations.</b> .....                                                                                                                                     | 6  |
| <b>Table S2. The statistics of fluorescence quenching efficiencies for Al<sup>3+</sup>/ Ga<sup>3+</sup>/ In<sup>3+</sup>/ Sc<sup>3+</sup>...</b> 7                                                                                                                                                                    |    |
| <b>Table S3. Relative Fluorescence ratios of GQDs or CDs</b> .....                                                                                                                                                                                                                                                    | 8  |
| <b>Fig. S7. The fluorescence spectra of C<sub>3</sub>N QDs w/o Li<sup>+</sup>, Na<sup>+</sup>, K<sup>+</sup>, Mg<sup>2+</sup>, Ca<sup>2+</sup>, Sr<sup>2+</sup>, Cu<sup>2+</sup>, Co<sup>2+</sup>, Ni<sup>2+</sup>, Au<sup>3+</sup>, Fe<sup>3+</sup>, and Cr<sup>3+</sup> ions at different concentrations.</b> ..... | 9  |
| <b>Table S4. The statistics of fluorescence quenching efficiencies for other ions than Al<sup>3+</sup>/ Ga<sup>3+</sup>/ In<sup>3+</sup>/ Sc<sup>3+</sup>.</b> .....                                                                                                                                                  | 10 |
| <b>Table S5. The fluorescence changes of GQDs or doped GQDs to various ions.</b> .....                                                                                                                                                                                                                                | 12 |
| <b>References</b> .....                                                                                                                                                                                                                                                                                               | 13 |

### Eq S1. Yield Calculation

The yield of C<sub>3</sub>N QDs can be calculated as the following equation: <sup>S1-S3</sup>

$$\text{yield} = \frac{M_{\text{C}_3\text{N QDs}}}{M_{\text{DAP}}} \quad \text{Eq S1}$$

where  $M_{\text{C}_3\text{N QDs}}$  is the mass of the obtained C<sub>3</sub>N QDs and  $M_{\text{DAP}}$  is the mass of the DAP powder dissolved in deionized water.

**Fig. S1. HRTEM patterns of C<sub>3</sub>N QDs**

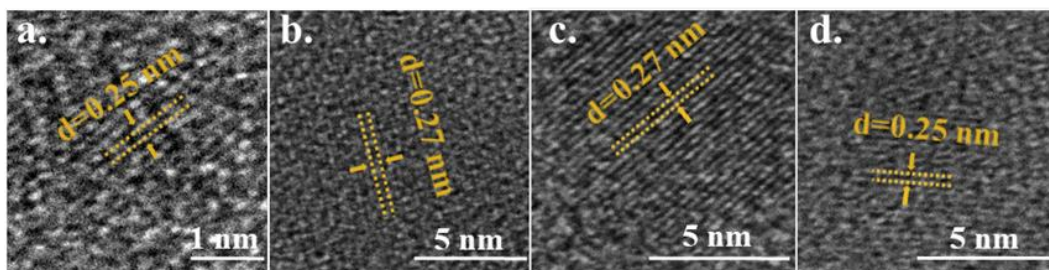

**Fig. S1. HRTEM patterns of C<sub>3</sub>N QDs.**

**Fig. S2. Particle Size Distribution of C<sub>3</sub>N QDs**

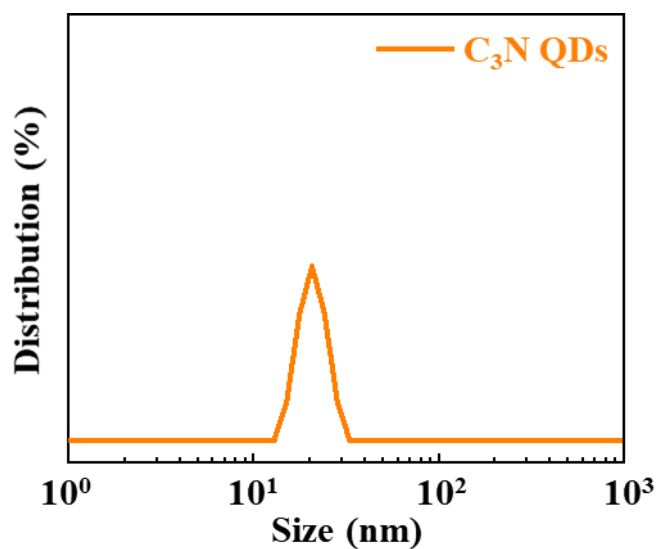

**Fig. S2. Particle size distribution of C<sub>3</sub>N QDs by nano-particle size analyzer.**

### Fig. S3. C 1s Spectra of DAP and C<sub>3</sub>N QDs

C 1s spectra of DAP and C<sub>3</sub>N QDs are shown in Fig. S3. For DAP and C<sub>3</sub>N QDs, the high resolution XPS spectra of C 1s can be divided into four components: C-C/C=C with a binding energy at 284.8 eV (grey); C-N at 285.6 eV (blue); C-O at 286.4 eV (purple) and C-NH<sub>2</sub>/C=O (green) at 288.7 eV.<sup>S4, S5</sup>

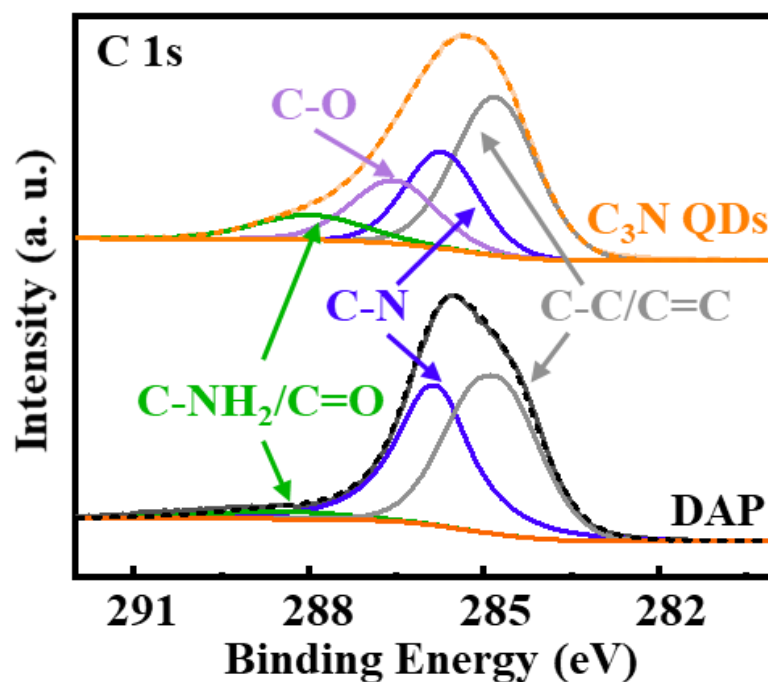

Fig. S3. The C 1s of C<sub>3</sub>N QDs and DAP

Table S1. Atomic fractions of C<sub>3</sub>N QDs and DAP by XPS

Table S1. Atomic fractions of C<sub>3</sub>N QDs and DAP by XPS

| Materials            | C%   | N%   | O%   |
|----------------------|------|------|------|
| DAP                  | 75.9 | 21.1 | 3.0  |
| C <sub>3</sub> N QDs | 63.4 | 20.2 | 16.4 |

### Fig. S4. FTIR Spectra of C<sub>3</sub>N QDs and DAP

FTIR spectra of C<sub>3</sub>N QDs and DAP are shown in Fig. S4. For C<sub>3</sub>N QDs and DAP, the peak at 3437 cm<sup>-1</sup> may be due to the N-H asymmetric vibration of -NH<sub>2</sub>. The peaks at 3310, 1497, and 1130 cm<sup>-1</sup> may be due to the N-H stretching vibration in parahelium structure.<sup>S6</sup> The peak at 3168 cm<sup>-1</sup> may be due to the C-N stretching vibration of edge benzene ring. The peaks at 1630, 1603, and 1527 cm<sup>-1</sup> may be due to C=N stretching in phenazine structure.<sup>S7</sup> The peaks at 1640 and 1558 cm<sup>-1</sup> may be attributed to the C=C stretching in phenazine structure. The peaks at 1334 and 1225 cm<sup>-1</sup> may be due to the C-N stretching in parahelium structure.

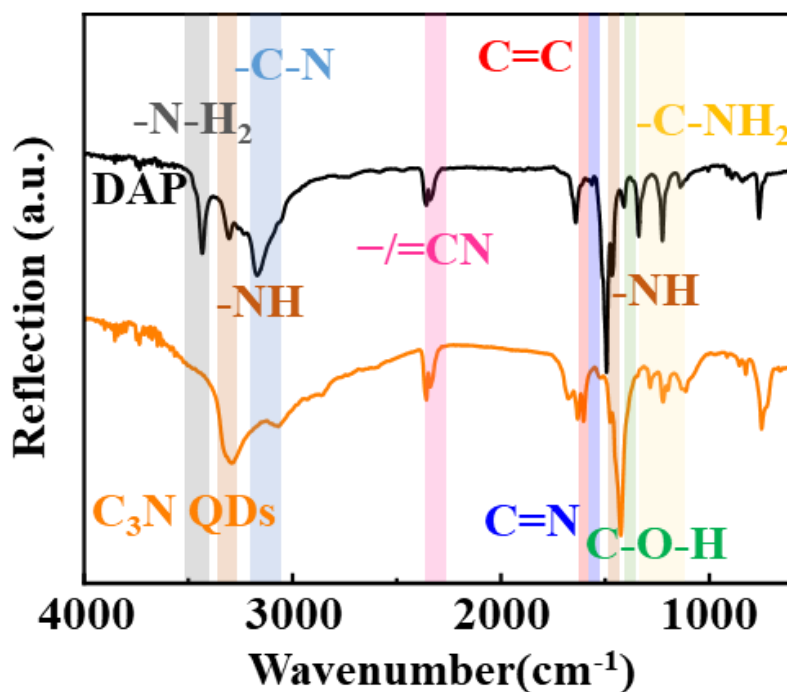

Fig. S4. Fourier transform infrared spectra of C<sub>3</sub>N QDs and DAP.

**Fig. S5. Lifetime of C<sub>3</sub>N QDs**

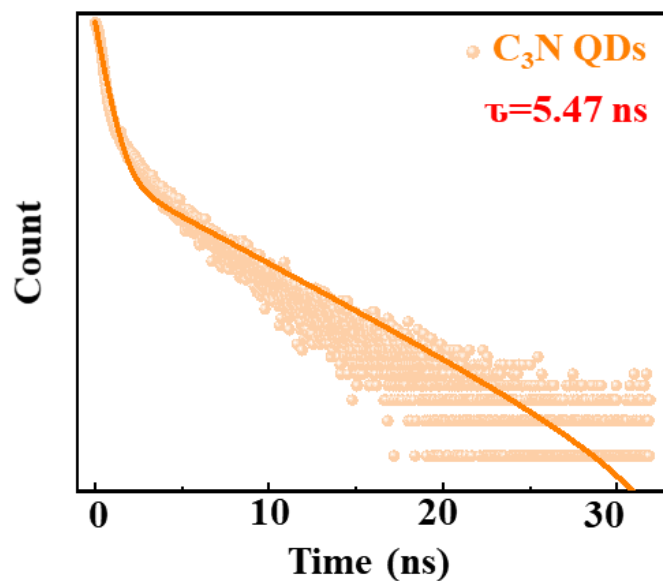

**Fig. S5.** Time resolved fluorescence spectra of of C<sub>3</sub>N QDs.

Considering the background of photons from laser, we adopted bi-exponential decay model to fit the lifetime curves. Based on fitting results, there are two components of the lifetime decay: one is 0.53 ns (94% of the population), the other is 5.47 ns (6% of the population), with  $\chi^2$  of 0.98.

**Fig. S6.** The fluorescence spectra of C<sub>3</sub>N QDs w/o Al<sup>3+</sup>, Ga<sup>3+</sup>, In<sup>3+</sup>, and Sc<sup>3+</sup> ions at different concentrations.

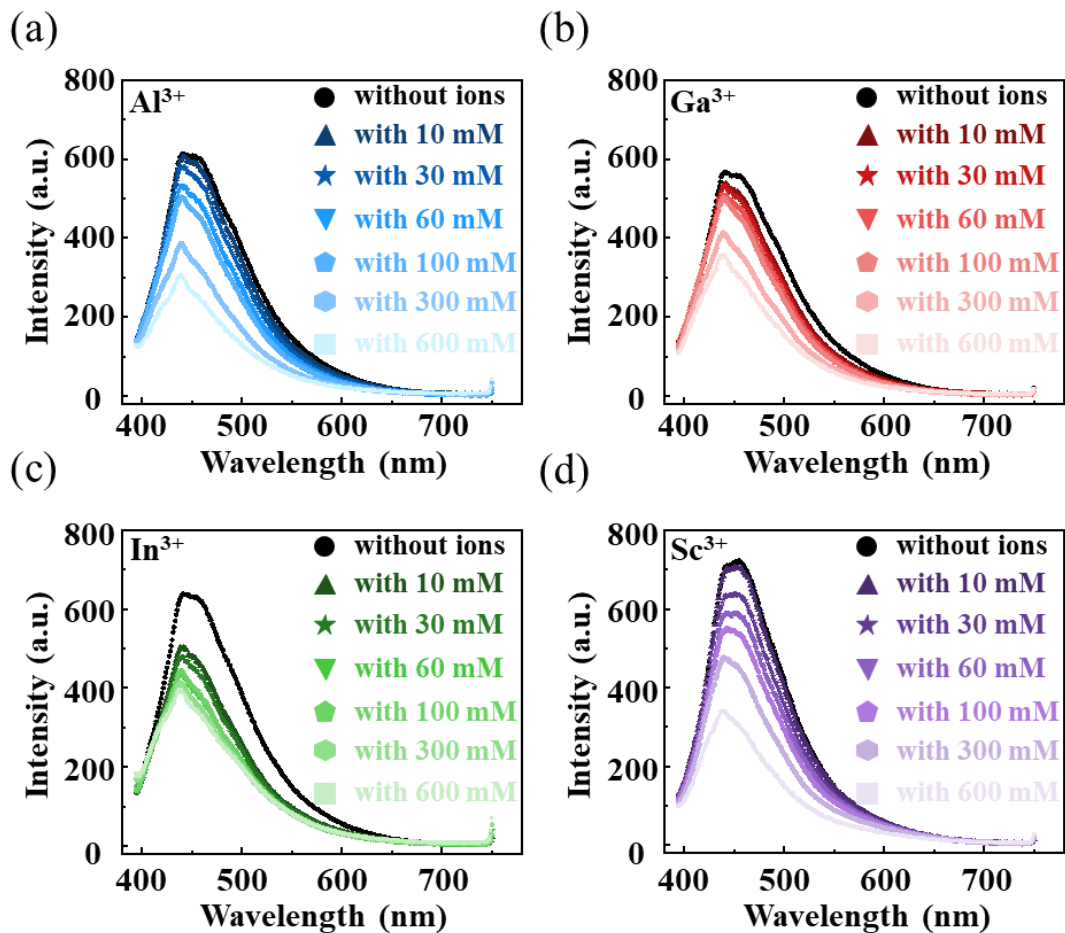

**Fig. S6.** The fluorescence spectra of C<sub>3</sub>N QDs w/o Al<sup>3+</sup>, Ga<sup>3+</sup>, In<sup>3+</sup>, and Sc<sup>3+</sup> ions at different concentrations. (a) Al<sup>3+</sup>, (b) Ga<sup>3+</sup>, (c) In<sup>3+</sup>, (d) Sc<sup>3+</sup>.

**Table S2. The statistics of fluorescence quenching efficiencies for Al<sup>3+</sup>/ Ga<sup>3+</sup>/ In<sup>3+</sup>/ Sc<sup>3+</sup>.**

**Table S2.** The statistics of fluorescence quenching efficiencies for Al<sup>3+</sup>/ Ga<sup>3+</sup>/ In<sup>3+</sup>/ Sc<sup>3+</sup>.

| Conditions       |                           | Fluorescence quenching efficiency:<br>(F-F <sub>0</sub> )/F <sub>0</sub> |        |        |                |
|------------------|---------------------------|--------------------------------------------------------------------------|--------|--------|----------------|
| Metal ions       | Ion Concentration<br>(mM) | Test 1                                                                   | Test 2 | Test 3 | Mean Value     |
| Al <sup>3+</sup> | 10                        | -0.045                                                                   | -0.062 | -0.060 | -0.056 ± 0.009 |
|                  | 30                        | -0.105                                                                   | -0.127 | -0.121 | -0.118 ± 0.011 |
|                  | 60                        | -0.216                                                                   | -0.193 | -0.206 | -0.205 ± 0.011 |
|                  | 100                       | -0.255                                                                   | -0.255 | -0.273 | -0.261 ± 0.010 |
|                  | 300                       | -0.438                                                                   | -0.442 | -0.465 | -0.448 ± 0.015 |
|                  | 600                       | -0.559                                                                   | -0.554 | -0.578 | -0.563 ± 0.013 |
| Ga <sup>3+</sup> | 10                        | -0.250                                                                   | -0.265 | -0.267 | -0.261 ± 0.009 |
|                  | 30                        | -0.319                                                                   | -0.310 | -0.270 | -0.300 ± 0.026 |
|                  | 60                        | -0.334                                                                   | -0.332 | -0.330 | -0.332±0.002   |
|                  | 100                       | -0.379                                                                   | -0.371 | -0.368 | -0.373 ± 0.006 |
|                  | 300                       | -0.396                                                                   | -0.383 | -0.415 | -0.398 ± 0.016 |
|                  | 600                       | -0.362                                                                   | -0.414 | -0.418 | -0.398 ± 0.031 |
| In <sup>3+</sup> | 10                        | -0.112                                                                   | -0.102 | -0.122 | -0.112 ± 0.010 |
|                  | 30                        | -0.151                                                                   | -0.113 | -0.154 | -0.139 ± 0.023 |
|                  | 60                        | -0.199                                                                   | -0.156 | -0.178 | -0.177 ± 0.021 |
|                  | 100                       | -0.227                                                                   | -0.188 | -0.215 | -0.210 ± 0.020 |
|                  | 300                       | -0.362                                                                   | -0.351 | -0.360 | -0.358 ± 0.006 |
|                  | 600                       | -0.447                                                                   | -0.449 | -0.461 | -0.452 ± 0.007 |
| Sc <sup>3+</sup> | 10                        | -0.011                                                                   | -0.018 | -0.010 | -0.013 ± 0.004 |
|                  | 30                        | -0.075                                                                   | -0.107 | -0.128 | -0.103 ± 0.027 |
|                  | 60                        | -0.145                                                                   | -0.178 | -0.187 | -0.170 ± 0.022 |
|                  | 100                       | -0.200                                                                   | -0.246 | -0.252 | -0.233 ± 0.028 |
|                  | 300                       | -0.340                                                                   | -0.352 | -0.368 | -0.353 ± 0.014 |
|                  | 600                       | -0.547                                                                   | -0.561 | -0.531 | -0.547 ± 0.015 |

\* Each test means one of the three independent experiments under same test conditions.

\*\*Values following the “±” symbol are the statistical deviation, using as the error bar in Fig.3.



### Table S3. Relative Fluorescence ratios of GQDs or CDs

Table S3. Relative Fluorescence ratios of GQDs or CDs in Fig. 3(b).

| Materials | Ion concentrations | $(F-F_0)/F_0$ | Ref. |
|-----------|--------------------|---------------|------|
| GQD-Al    | 100 $\mu$ M        | 0.60          | S8   |
| GQD-Ga    | 100 mM             | 0.21          | S9   |
| CD-In     | 10 $\mu$ M         | 0.51          | S9   |
| GQD-Sc    | 100 mM             | 0.31          | S9   |

**Fig. S7.** The fluorescence spectra of  $C_3N$  QDs w/o  $Li^+$ ,  $Na^+$ ,  $K^+$ ,  $Mg^{2+}$ ,  $Ca^{2+}$ ,  $Sr^{2+}$ ,  $Cu^{2+}$ ,  $Co^{2+}$ ,  $Ni^{2+}$ ,  $Au^{3+}$ ,  $Fe^{3+}$ , and  $Cr^{3+}$  ions at different concentrations.

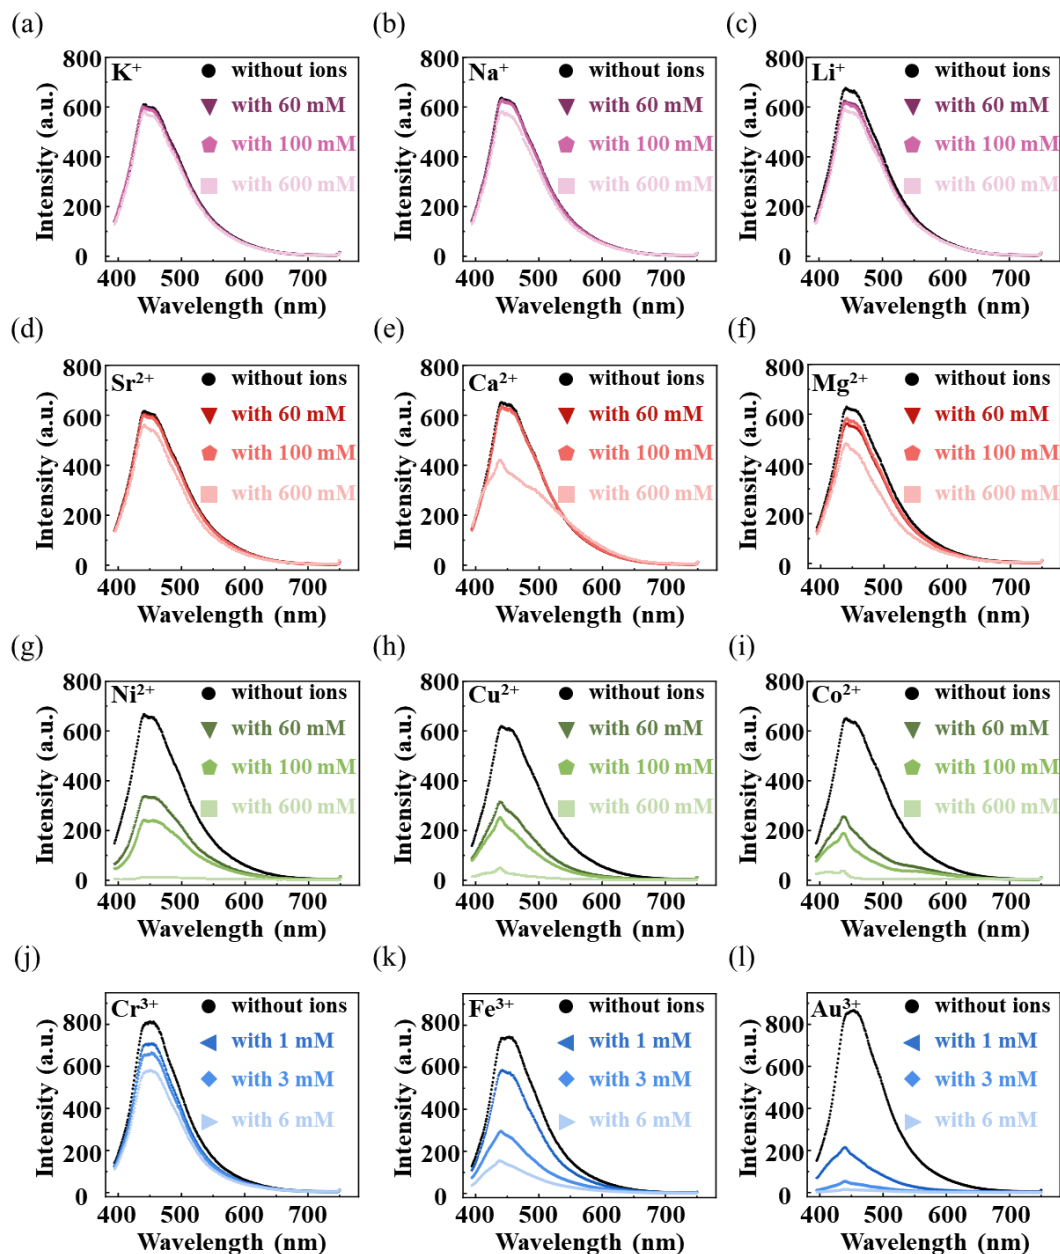

**Fig. S7.** The fluorescence spectra of  $C_3N$  QDs w/o monovalent alkaline metals ( $Li^+$ ,  $Na^+$ , and  $K^+$ ), divalent alkaline-earth metals ( $Mg^{2+}$ ,  $Ca^{2+}$ , and  $Sr^{2+}$ ), and multivalent transition metals ( $Cu^{2+}$ ,  $Co^{2+}$ ,  $Ni^{2+}$ , and  $Au^{3+}$ ,  $Fe^{3+}$ ,  $Cr^{3+}$ ) at different concentrations. (a)  $K^+$ , (b)  $Na^+$ , (c)  $Li^+$ , (d)  $Sr^{2+}$ , (e)  $Ca^{2+}$ , (f)  $Mg^{2+}$ , (g)  $Ni^{2+}$ , (h)  $Cu^{2+}$ , (i)  $Co^{2+}$ , (j)  $Cr^{3+}$ , (k)  $Fe^{3+}$ , (l)  $Au^{3+}$ .

**Table S4. The statistics of fluorescence quenching efficiencies for other ions than Al<sup>3+</sup>/ Ga<sup>3+</sup>/ In<sup>3+</sup>/ Sc<sup>3+</sup>.**

**Table S4.** The statistics of fluorescence quenching efficiencies for other ions than Al<sup>3+</sup>/ Ga<sup>3+</sup>/ In<sup>3+</sup>/ Sc<sup>3+</sup>.

| Conditions       |                           | Fluorescence quenching efficiency:<br>( $F-F_0$ )/ $F_0$ |        |        |                |
|------------------|---------------------------|----------------------------------------------------------|--------|--------|----------------|
| Metal ions       | Ion Concentration<br>(mM) | Test 1                                                   | Test 2 | Test 3 | Mean Value     |
| K <sup>+</sup>   | 60                        | -0.021                                                   | -0.014 | -0.009 | -0.014 ± 0.006 |
|                  | 100                       | -0.036                                                   | -0.021 | -0.015 | -0.024 ± 0.011 |
|                  | 600                       | -0.072                                                   | -0.066 | -0.066 | -0.068 ± 0.004 |
| Na <sup>+</sup>  | 60                        | -0.011                                                   | -0.006 | -0.014 | -0.010 ± 0.004 |
|                  | 100                       | -0.022                                                   | -0.017 | -0.020 | -0.020 ± 0.003 |
|                  | 600                       | -0.106                                                   | -0.096 | -0.101 | -0.101 ± 0.005 |
| Li <sup>+</sup>  | 60                        | -0.072                                                   | -0.060 | -0.086 | -0.073 ± 0.013 |
|                  | 100                       | -0.096                                                   | -0.082 | -0.078 | -0.085 ± 0.010 |
|                  | 600                       | -0.133                                                   | -0.122 | -0.123 | -0.126 ± 0.006 |
| Sr <sup>2+</sup> | 60                        | -0.028                                                   | -0.016 | -0.022 | -0.022 ± 0.006 |
|                  | 100                       | -0.038                                                   | -0.026 | -0.036 | -0.033 ± 0.006 |
|                  | 600                       | -0.131                                                   | -0.120 | -0.129 | -0.127 ± 0.006 |
| Ca <sup>2+</sup> | 60                        | -0.021                                                   | -0.021 | -0.022 | -0.022 ± 0.001 |
|                  | 100                       | -0.018                                                   | -0.020 | -0.015 | -0.018 ± 0.002 |
|                  | 600                       | -0.206                                                   | -0.242 | -0.257 | -0.235 ± 0.026 |
| Mg <sup>2+</sup> | 60                        | -0.140                                                   | -0.115 | -0.102 | -0.119 ± 0.019 |
|                  | 100                       | -0.099                                                   | -0.091 | -0.087 | -0.093 ± 0.006 |
|                  | 600                       | -0.275                                                   | -0.280 | -0.280 | -0.278 ± 0.003 |
| Ni <sup>2+</sup> | 60                        | -0.490                                                   | -0.499 | -0.499 | -0.496 ± 0.005 |
|                  | 100                       | -0.628                                                   | -0.634 | -0.634 | -0.632 ± 0.003 |
|                  | 600                       | -0.972                                                   | -0.977 | -0.977 | -0.975 ± 0.003 |
| Cu <sup>2+</sup> | 60                        | -0.555                                                   | -0.549 | -0.576 | -0.560 ± 0.014 |
|                  | 100                       | -0.665                                                   | -0.662 | -0.667 | -0.664 ± 0.002 |
|                  | 600                       | -0.948                                                   | -0.948 | -0.950 | -0.949 ± 0.001 |
| Co <sup>2+</sup> | 60                        | -0.650                                                   | -0.650 | -0.651 | -0.650 ± 0.000 |
|                  | 100                       | -0.757                                                   | -0.758 | -0.757 | -0.758 ± 0.000 |
|                  | 600                       | -0.958                                                   | -0.958 | -0.958 | -0.958 ± 0.000 |
| Cr <sup>3+</sup> | 1                         | -0.129                                                   | -0.186 | -0.098 | -0.138 ± 0.045 |
|                  | 3                         | -0.186                                                   | -0.191 | -0.195 | -0.191 ± 0.005 |
|                  | 6                         | -0.277                                                   | -0.288 | -0.299 | -0.288 ± 0.011 |

|                        |          |        |        |        |                |
|------------------------|----------|--------|--------|--------|----------------|
| <b>Fe<sup>3+</sup></b> | <b>1</b> | -0.220 | -0.226 | -0.278 | -0.241 ± 0.032 |
|                        | <b>3</b> | -0.580 | -0.631 | -0.643 | -0.618 ± 0.033 |
|                        | <b>6</b> | -0.781 | -0.807 | -0.809 | -0.799 ± 0.015 |
| <b>Au<sup>3+</sup></b> | <b>1</b> | -0.780 | -0.788 | -0.792 | -0.787 ± 0.006 |
|                        | <b>3</b> | -0.945 | -0.949 | -0.952 | -0.949 ± 0.004 |
|                        | <b>6</b> | -0.980 | -0.982 | -0.983 | -0.981 ± 0.001 |

\* Each test means one of the three independent experiments under same test conditions.

\*\*Values following the “±” symbol are the statistical deviation, using as the error bar in **Fig.4**.

**Table S5. The fluorescence changes of carbon-based QDs to various ions.**

**Table S5.** The fluorescence changes of carbon-based QDs to various ions.

| <b>Metal ions</b>      | <b>Type of carbon-based QDs</b>      | <b>Ion concentrations (<math>\mu\text{M}</math>)</b> | <b>Fluorescence change</b> | <b>Ref</b> |
|------------------------|--------------------------------------|------------------------------------------------------|----------------------------|------------|
| <b>Al<sup>3+</sup></b> | GQDs                                 | 0-12500                                              | <b>enhance</b>             | S11        |
|                        | NBD-hnap                             | 0-3                                                  |                            | S12        |
|                        | B-GQDs                               | 0-1.5                                                | <b>reduce</b>              | S13        |
|                        | N,B-GQDs                             | 0-400                                                |                            | S14        |
|                        | Hydroxylated-GQDs                    | 0-10000                                              |                            | S15        |
| <b>In<sup>3+</sup></b> | CDs                                  | 0-33                                                 | <b>enhance</b>             | S10        |
|                        | NBD-hnap                             | 0-3                                                  |                            | S12        |
| <b>Sc<sup>3+</sup></b> | GQDs                                 | 0-100                                                | <b>enhance</b>             | S9         |
| <b>Ga<sup>3+</sup></b> | BTC                                  | 0-100                                                | <b>enhance</b>             | S16        |
|                        | NBD-hnap                             | 0-3                                                  |                            | S12        |
|                        | HT                                   | 0-80                                                 |                            | S17        |
|                        | DHTC                                 | 0-30                                                 |                            | S18        |
| <b>Au<sup>3+</sup></b> | CDs                                  | 0-15                                                 | <b>reduce</b>              | S19        |
|                        | C nanodots                           | 0.2-45                                               |                            | S20        |
| <b>Fe<sup>3+</sup></b> | N-CDs                                | 0-100                                                | <b>reduce</b>              | S21        |
|                        | N-GQDs                               | 0-10000                                              |                            | S22        |
|                        | Hydroxylated-GQDs                    | 0-50000                                              |                            | S15        |
| <b>Cr<sup>3+</sup></b> | Hydroxylated-GQDs                    | 0-40000                                              | <b>reduce</b>              | S15        |
| <b>Cu<sup>2+</sup></b> | CDs@ g-C <sub>3</sub> N <sub>4</sub> | 0-0.01                                               | <b>enhance</b>             | S23        |
|                        | N-GQDs                               | 0-200                                                | <b>reduce</b>              | S22        |
|                        | Hydroxylated-GQDs                    | 0-25000                                              |                            | S15        |
|                        | N-CDs                                | 0-100                                                |                            | S24        |
| <b>Co<sup>2+</sup></b> | CDs                                  | 0-50                                                 | <b>reduce</b>              | S25        |
|                        | CDs                                  | 0-500                                                |                            | S26        |

## References

- S1. Y. H. Shin, J. H. Lee, J. H. Yang, J. Park, K. Lee, S. J. Kim, Y. H. Park, and H. Lee, *Small*, 2014, 10.5, 866-870.
- S2. Y. Q. Sun, S. Q. Wang, C. Li, P. H. Luo, L. Tao, Y. Wei, and G. Q. Shi, *Physical Chemistry Chemical Physics*, 2013, 15.24, 9907-9913.
- S3. H. G. Huang, S. W. Yang, Q. T. Li, Y. C. Yang, G. Wang, X. F. You, B. H. Mao, H. S. Wang, Y. Ma, P. He, Z. Liu, G. Q. Ding, and X. M. Xie, *Langmuir*, 2018, 34.1, 250-258.
- S4. S. Liu, J. Q. Tian, L. Wang, Y. W. Zhang, X. Y. Qin, Y. L. Luo, A. M. Asiri, A. O. Al-Youbi, X. P. Sun, *Advanced materials*, 2012, 24.15, 2037-2041.
- S5. L. Cao, M. H. Zan, F. M. Chen, X. Y. Kou, Y. L. Liu, P. Y. Wang, Q. Mei, Z. Hou, W. F. Dong, L. Li, *Carbon*, 2022, 194, 42-51.
- S6. S. W. Yang, W. Li, C. C. Ye, G. Wang, H. Tian, C. Zhu, P. He, G. Q. Ding, X. M. Xie, Y. Liu, *Advanced Materials*, 2017, 29.16, 1605625.
- S7. Z. H. Tian, T. Heil, J. Schmidt, S. K. Cao, and M. Antonietti, *ACS applied materials & interfaces*, 2020, 12.11, 13127-13133.
- S8. B. B. Chen, R. S. Li, M. L. Liu, H. Y. Zou, H. Liu, C. Z. Huang, *Talanta*, 2018, 178, 172-177.
- S9. J. Yang, P. Li, Z. L. Song, J. Li, H. Yang, Y. Fan, L. Li, C. Xu, J. L. Chen, L. Chen, *Appl. Surf. Sci.*, 2022, 593, 153367.
- S10. S. Pawar, S. Kaja and A. Nag, *ACS omega.*, 2020, 5.14, 8362-8372.
- S11. M. M. Yao K. Huang, Z. H. Deng, Y. Wen, Y. L. Yuan, F. Nie, H. Wang, F. Y. Du, and Y. Zhang, *Analyst*, 2020, 145, 6981-6986.
- S12. Q. X. Zheng, F. Ding, X. J. Hu, J. Y. Feng, J. L. Shen, X. J. He, *Bioorganic Chemistry*, 2021, 109, 0045-2068.
- S13. W. Li, L. Zhang, N. Jiang, Y. Q. Chen, J. Gao, J. H. Zhang, B. S. Yang, and J. L. Liu, *Molecules*, 2022, 27, 6771.
- S14. X. Li, L. X. Zhao, Y. H. Wu, A. Zhou, X. F. Jiang, Y. Zhan, Z. G. Sun, *Spectrochimica Acta Part A: Molecular and Biomolecular Spectroscopy*, 2022, 282, 1386-1425.
- S15. Q. Ge, W. H. Kong, X. Q. Liu, Y. M. Wang, L. F. Wang, N. Ma, Y. Li, *International Journal of Minerals Metallurgy and Materials*, 2020, 27, 91-99.
- S16. H. Y. Xiang, T. R. Wang, S. X. Tang, Y. J. Wang, N. Xiao, *Spectrochimica Acta Part A: Molecular and Biomolecular Spectroscopy*, 2022, 267, 1386-1425.
- S17. L. J. Yang, M. X. Li, Y. Y. Wang, Y. Zhang, Z. P. Liu, S. T. Ruan, Z. L. Wang, and S. F. Wang, *Analyst*, 2021, 146, 7294-7305.
- S18. J. S. Heo, D. Gil, C. Kim, *Luminescence*, 2022, 37, 684-690.
- S19. Y. Guo, T. Li, L. W. Xie, X. Tong, C. Tang, S. Y. Shi, *Analytical And Bioanalytical Chemistry*, 2021, 413, 935-943.
- S20. Y. Z. Fan, S. G. Liu, Y. Zhang, W. Ren, Z. Sun, B. L. Li, H. Q. Luo,

- N. B. Li, *Applied Surface Science*, 2020, 526, 0169-4332.
- S21. M. H. Qin, S. Y. Zong, P. Zhang, J. Y. Li, *Journal of Materials Science*, 2023, 58, 7559–7570
- S22. Q. Yao, H. Y. Wu, Y. H. Jin, C. L. Wang, R. T. Zhang, Y. J. Lin, S. J. Wu, Y. H. Hu, *Current Applied Physics*, 2022, 41, 1567-1739.
- S23. K. Radhakrishnan, S. Sivanesan, P. Panneerselvam, *Journal of Photochemistry and Photobiology A: Chemistry*, 2020, 389, 1010-6030.
- S24. B. Gao, D. Chen, B. L. Gu, T. Wang, Z. H. Wang, F. Xie, Y. S. Yang, Q. L. Guo, G. Wang, *Current Applied Physics*, 2020, 20, 1567-1739.
- S25. C. Y. Li, N. Li, L. Yang, L. Liu, D. H. Zhang, *Spectrochimica Acta Part A: Molecular and Biomolecular Spectroscopy*, 2024, 309, 1386-1425.
- S26. G. K. Hu, L. Ge, Y. Y. Li, M. Mukhtar, B. Shen, D. S. Yang, J. G. Li, *Journal of Colloid and Interface Science*, 2020, 579, 0021-9797.
